# Supplementary material for: Pursuing the quest for better understanding the taxonomic distribution of the system of doubly uniparental inheritance of mtDNA
Source: PeerJ journal article supplement (doi:10.7717/peerj.2760), 2016-12-13

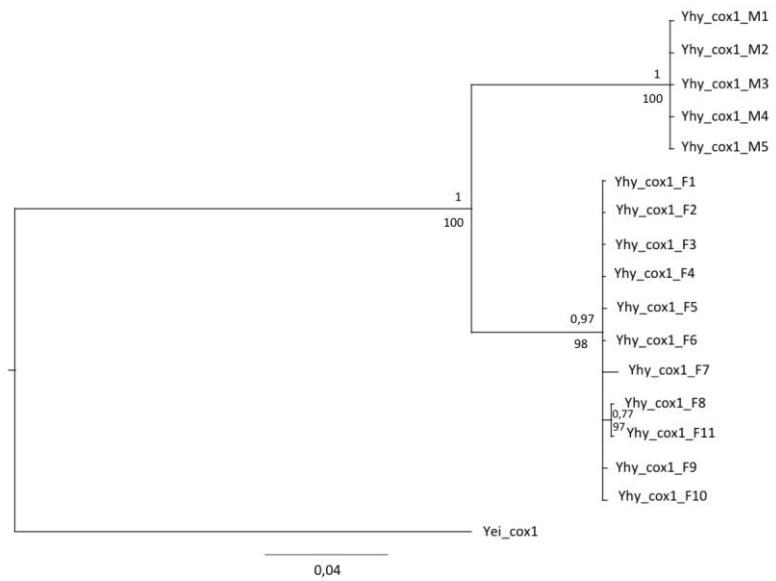

Supplement: FigureS2.pdf [file FigureS2.pdf]
